# Supplementary material
Source: HighWire-hosted journal article supplement (https://gut.bmj.com/content/66/9/1665)

# **GATA6 regulates EMT and tumor dissemination, and correlates with response to adjuvant chemotherapy in pancreatic cancer**

Paola Martinelli<sup>1,2\*</sup>, Enrique Carrillo-de Santa Pau<sup>1</sup>, Trevor Cox<sup>3,4</sup>, Bruno Sainz Jr<sup>5</sup>, Nelson Dusetti<sup>6</sup>, William Greenhalf<sup>4</sup>, Lorenzo Rinaldi<sup>1#</sup>, Eithne Costello<sup>3</sup>, Paula Ghaneh<sup>3,4</sup>, Núria Malats<sup>7</sup>, Markus Büchler<sup>8</sup>, Marina Pajic<sup>9</sup>, Andrew V Biankin<sup>9,12</sup>, Juan Iovanna<sup>6</sup>, John Neoptolemos<sup>3,4</sup>, Francisco X. Real<sup>1,13\*</sup>

## **SUPPLEMENTARY MATERIAL**

### **EXTENDED EXPERIMENTAL PROCEDURES**

**ChIP-Seq.** After performing ChIP as described, both input pool (20ng) and individual sample (6ng) DNA, were resolved by electrophoresis and fractions of 50-250bp were taken. 1-3 ng of DNA fraction per sample was processed through subsequent enzymatic treatments of end-repair, dA-tailing, and ligation to adapters as in Illumina's "TruSeq DNA Sample Preparation Guide" (part # 15005180 Rev. C). Adapter-ligated libraries were completed by limited-cycle PCR with Illumina PE primers. The resulting purified DNA library was applied to an Illumina flow cell for cluster generation (TruSeq cluster generation kit v5) and sequenced on the Genome Analyzer IIx with SBS TruSeq v5 reagents by following manufacturer's protocols. Image analysis and per-cycle base calling was performed with Illumina Real Time Analysis software (RTA1.13). Conversion to FASTQ read format was performed with CASAVA-1.8 (Illumina). Sequence alignment to the reference genome (GRCh37/hg19, February 2009) was made with BWA version 0.5.9-r16 algorithm allowing up to 0/1 mismatches, using default settings. Only unique reads were kept for the analysis and ChIP-seq and Input alignments files were normalized to the same number of reads before the peak detection.

To visualize the data in the University of California Santa Cruz genome browser (<http://genome.ucsc.edu>) the reads were directionally extended to 300 bp and, for each base pair in the genome, the number of overlapping sequence reads was determined and averaged over a 10 bp window to create a wig file. ChIP-Seq data are deposited in GEO: GSE47537.

Sequences of the primers used for ChIP-qPCR are shown in Supplementary Table S7.

**Peak finding and motif discovery.** Significant peaks of GATA6 binding were identified with MACS (1) v1.4 using model fold =20,40 and the other settings by default. Peaks with a FDR<1 were selected for further analysis. PeakAnalyzer software was used to identify functional elements proximal to the GATA6 peaks. Motifs were identified with the MEME suite (2), using peaks with FDR<1, and then TOMTOM (3) was used to compare the identified motifs with known transcriptional motifs.

**Genomic analysis of gene copy number changes in *GATA6* and *SMAD4*.** CGH data from human primary pancreatic tumors were obtained from public datasets under the accession numbers E-MTAB-570, GSE25273, and GSE7599. Agilent aCGH data were normalized with Limma 3.8.2 package using "normexp" method for background correction (4) and "median" method for normalization within arrays (5). WaviCGH (6) was used in further analyses with "DNAcopy" method for segmentation (7) and "probability" for calling (8). *GATA6* and *SMAD4* were considered lost or gained when the probability of either of the two events was higher than 0.5.

**PDAC meta-dataset generation and analyses.** Four expression datasets generated using Affymetrix array platform HG133plus2 were downloaded from GEO (GSE32688, GSE22780, GSE16515, GSE15471, involving 67 normal pancreas and 108 tumor pancreas samples. All datasets were normalized at the same time using Frozen Robust Multi-Array Analysis (fRMA) (9), furthermore the barcode algorithm was used to estimate whether the genes of interest were expressed or not in the different samples (10). Statistical analyses were performed using R version 2.14.1., the Mann–Whitney–Wilcoxon test was performed to compare GATA6 expression between samples expressing, or not, KRT14. Pearson's correlation coefficient was calculated for GATA6-FOXA2, GATA6-E-cadherin, and FOXA2-E-cadherin comparisons.

**Patient samples and xenografts.** Patients from the French series were included in the Paoli-Calmettes Institute clinical trial number 2011-A01439-32. Three expert clinical centers collaborated to the project after approval by the ethics review boards (approval number 11-61). Patient informed consent forms were collected and registered in a central database. The tumor tissue used for xenograft development was deemed excess to that required for the patient's diagnosis. Two types of samples were obtained, namely Endoscopic Ultrasound-Guided Fine-Needle Aspiration (EUS-FNA) biopsies from patients with unresectable tumors and a tumor piece from patients undergoing surgery. Pathology reports were obtained for each patient sample. All samples were anonymized. Histopathologic evaluation was performed on 5-µm H&E-stained sections of patient tumors and xenografts under a light microscope.

Each sample obtained from EUS-FNA was mixed with 100 µl of Matrigel (BD Biosciences) and injected in the upper right flank of a nude mouse (Swiss Nude Mouse Crl: NU(lco)-Foxn1nu, Charles River Laboratories). Each sample derived from surgery resection was fragmented, mixed with 100 µl of Matrigel (BD Biosciences) and implanted with a trocar (10 Gauge, Innovative Research of America, Sarasota, FL) in the subcutaneous right upper flank of an anesthetized and disinfected mouse. When tumors reached 1 cm<sup>3</sup>, mice were sacrificed and tumors were removed. The study on animals was approved by the “Plateforme of Stabulation et d’Expérimentation Animale” (PSEA), Scientific Park of Luminy, Marseille (11).

**Gene expression microarrays.** For RNA extraction, xenografted tumors were removed from mice at passage 2 and immediately placed in cold guanidinium thiocyanate (4 M), followed by protein denaturation and RNAs extraction according to Chirgwin’s protocol (Chirgwin et al., 1979). Total RNA (1.0 µg) was reverse transcribed for hybridization to the human oligonucleotide array Human Gene 2.0 (Genechip, Affymetrix). Arrays were processed using the Affymetrix GeneChip Fluidic Station 450 (protocol EukGE-WS2v5\_450) and scanned using a GeneChip Scanner 3000 G7 (Affymetrix). The GeneChip Operating Software (Affymetrix GCOS v1.4) was used to obtain chip images and for quality control. Background subtraction and normalization of probe set intensities were performed using the method of Robust Multiarray Analysis (RMA). PCA analysis was performed using Genomics Suite software (Partek). Gene set enrichment analysis (GSEA) was performed on the Broad Institute Platform and statistical significance (false discovery rate, FDR) was set at 0.25. Microarray analysis was performed by the CRCHUL (CHUQ) Gene Expression Platform, Quebec, Canada.

All array data are available at National Center for Biological Information (NCBI) Gene Expression Omnibus (GEO) omnibus GSE55513

**Statistical analyses on clinical data.** The normality of the distribution of GATA6 expression values was assessed. For the French series, three categories were defined: low (<500), medium (500-1000), and high (>1000). Associations between demographics and clinico-pathological parameters and GATA6 categories were assessed using the Pearson’s chi-squared test or Fisher’s exact test (for N< 5). Kaplan-Meier curves were estimated for the 58 patients with available follow-up data. Overall median survival time (interquartile range, IQR) was 12.3 (8.2 - 17.6). Unadjusted and sex- and age-adjusted Cox proportional hazard regression was used to estimate the hazard ratio (HR) and 95% confidence intervals (95%CI) to analyze the association between levels of GATA6 and survival.

Data summaries of patients included in the ESPAC-3 study are provided as frequency counts for categorical variables and median (IQR) for continuous variables. Low,

medium and high GATA6 categories were defined for GATA6 scores <100, 100-200, >200 respectively. Hypothesis tests were performed for categorical variables using the chi-square test or Fisher's exact test with significance taken as  $P < 0.05$ . Both univariate and multivariate Cox proportional hazards models were fitted, the latter using a stepwise approach. Kaplan-Meier curves were calculated and differences between groups assessed using the log-rank test. All statistical analyses were performed using SAS v9.3 statistical software.

### **Supplementary references**

1. Zhang Y, Liu T, Meyer CA, Eeckhoute J, Johnson DS, Bernstein BE, et al. Model-based analysis of ChIP-Seq (MACS). *Genome Biol.* 2008;9:R137.
2. Machanick P, Bailey TL. MEME-ChIP: Motif analysis of large DNA datasets. *Bioinformatics.* 2011;27:1696–7.
3. Gupta S, Stamatoyannopoulos JA, Bailey TL, Noble WS. Quantifying similarity between motifs. *Genome Biol.* 2007;8:R24.
4. Ritchie ME, Silver J, Oshlack A, Holmes M, Diyagama D, Holloway A, et al. A comparison of background correction methods for two-colour microarrays. *Bioinformatics.* 2007;23:2700–7.
5. Smyth GK, Speed T. Normalization of cDNA microarray data. *Methods.* 2003;31:265–73.
6. Carro A, Rico D, Rueda OM, Díaz-Uriarte R, Pisano DG. waviCGH: a web application for the analysis and visualization of genomic copy number alterations. *Nucleic Acids Res.* 2010;38:W182–7.
7. Olshen AB, Venkatraman ES, Lucito R, Wigler M. Circular binary segmentation for the analysis of array-based DNA copy number data. *Biostatistics.* 2004;5:557–72.
8. Van de Wie MA, Kim KI, Vosse SJ, van Wieringen WN, Wilting SM, Ylstra B. CGHcall: Calling aberrations for array CGH tumor profiles. *Bioinformatics.* 2007;23:892–4.
9. McCall MN, Bolstad BM, Irizarry RA. Frozen robust multiarray analysis (fRMA). *Biostatistics.* 2010;11:242–53.
10. McCall MN, Uppal K, Jaffee HA, Zilliox MJ, Irizarry RA. The gene expression barcode: Leveraging public data repositories to begin cataloging the human and murine transcriptomes. *Nucleic Acids Res.* 2011;39.
11. Duconseil P, Gilabert M, Gayet O, Loncle C, Moutardier V, Turrini O, et al. Transcriptomic Analysis Predicts Survival and Sensitivity to Anticancer Drugs of Patients with a Pancreatic Adenocarcinoma. *Am J Pathol. American Society for Investigative Pathology*; 2015;185:1022–32.

## **SUPPLEMENTARY DATASETS**

**Supplementary Dataset 1.** Genome-wide analysis of GATA6 binding to the DNA (ChIP-Seq) in PaTu8988S cells.

**Supplementary Dataset 2.** Gene expression comparison between GATA6<sup>low</sup> and GATA6<sup>high</sup> PDACs.

**Supplementary Dataset 3.** Overlap between the BASE47 gene signature, the GATA6 ChIP-Seq, and RNA-Seq data in PaTu8988S shG6-1 versus shCtrl.

## **SUPPLEMENTARY TABLES**

**Supplementary Table 1.** Gene-Enrichment and Functional Annotation of the genes with a GATA6 peak within 1kb from TSS and FDR<0.1%.

**Supplementary Table 2.** Details of the CNV analyses in PDAC samples

**Supplementary Table 3.** GSEA analysis on the genes differentially expressed in GATA6<sup>low</sup> versus GATA6<sup>high</sup> tumors (FDR<0.01).

**Supplementary Table 4.** Univariate analysis of the 59 patients from the xenografted series classified in three GATA6-dependent categories.

**Supplementary Table 5.** Association of GATA6 with the clinico-pathological characteristics of the patients included in the ESPAC-3 trial.

**Supplementary Table 6.** Demographics of the patients included in the ESPAC-3 trial.

**Supplementary Table 7.** Full univariate analysis of the patients included in the ESPAC-3 trial.

**Supplementary Table 8.** Multivariate analysis of the patients included in the ESPAC-3 trial.

**Supplementary Table 9.** Mutational status of the PDAC cell lines used in this study, plus Panc1 (used in a previous study about GATA6).

**Supplementary Table 10.** Primary antibodies used in this study.

**Supplementary Table 11.** Sequence of primers used in this study.

## SUPPLEMENTARY FIGURE LEGENDS

**Supplementary Figure 1. GATA6 expression in PDAC cells.** (A) RT-qPCR analysis of GATA6 mRNA levels in a panel of PDAC cell lines, relative to HPRT. In red are the cell lines that were used in subsequent experiments. (B) Western blot showing the protein levels of GATA6, E-cadherin, and vimentin. Vinculin was used as loading control.

**Supplementary Figure 2. GATA6 knock-down and overexpression.** (A-C) Top: microphotographs showing the PDAC cell lines that were used for GATA6 knock-down experiments. Bottom: GATA6 expression in A13B, PaTu8988S, SK-PC-1 infected with the indicated constructs, measured by RT-qPCR. (D) Expression of GATA6, E-cadherin, and vimentin detected by western blotting in total lysates from A13B and SK-PC-1 cells infected with the indicated constructs. GAPDH was used as a loading control. (E) Quantification of the *in vitro* invasiveness of SK-PC-1 cells infected with the indicated constructs. (F) Microphotograph of parental L3.6pl cells, used for GATA6 overexpression, and (bottom) mRNA levels of GATA6 in L3.6pl cells infected with the indicated constructs. Data are presented as mean $\pm$ s.e.m. of at least three independent experiments; \* $P$ <0.05, \*\* $P$ <0.01.

**Supplementary Figure 3. GATA6 expression is lower in metastases compared to primary tumors.** Boxplot showing the expression of GATA6 in normal pancreas (norm, adjacent to PDAC), primary tumors (PDAC), and metastases (met) in the patients' series described by Moffitt et al. \*\* $P$ <0.001

**Supplementary Figure 4. GATA6 ChIP-Seq validation and ChIP analysis of FOXA2 on GATA6 targets.** (A) Top: Representative genomic distribution of GATA6 in a region of human chromosome 14, as displayed in the UCSC genome browser. Tag counts (top-red for GATA6-ChIP and blue for input) and called peaks (bottom) tracks are shown. Bottom: core matrices obtained for the most significantly enriched motifs found in the GATA6 ChIP-Seq peaks. (B) Distribution of GATA6 ChIP-Seq peaks according to their distance from the closest transcription start site (TSS). (C) GATA6 binding to the promoter region of the indicated genes detected by ChIP-qPCR in PaTu8988S cells, represented as % of input chromatin and compared with non-specific IgG binding. Data are shown as mean $\pm$ s.e.m of at least three independent experiments; \* $P$ <0.05, \*\* $P$ <0.01. (D) Representation of the ChIP-Seq peaks found in the promoter of SNAI1, ZEB1, ZEB2, and VIM, as displayed in the UCSC genome browser. Scale bar: 5Mb. (E) FOXA2 binding to the promoter of the indicated genes, selected as GATA6 targets. UP and DOWN refers to the regulation of the

corresponding mRNAs in GATA6-silenced PaTu8988S cells. Data are presented as mean±s.e.m. of at least three independent experiments; \* $P$ <0.05, \*\* $P$ <0.01.

**Supplementary Figure 5. GATA6 correlates with the epithelial phenotype in primary tumors.** Scatter plots showing correlated expression of GATA6, FOXA2, and E-cadherin mRNA in the Moffitt series.  $P$ <0.001 for all the comparisons.

**Supplementary Figure 6. GATA6<sup>low</sup> tumors display upregulation of pathways associated with basal breast cancer.** GSEA plots showing some of the genesets that were most enriched within the genes upregulated in GATA6<sup>low</sup> tumors.

**Supplementary Figure 7. Low GATA6 is detected in a BAS-L subtype of PDACs.** (A) Heat map showing the expression of the BASE47 signature in a meta-dataset of 108 PDAC samples; clustering was performed with the Hierarchical Clustering tool of the GenePattern suite. (B) Boxplot showing the expression of GATA6 in the two groups classified by the BASE47 signature. \*\* $P$ <0.0001.

**Supplementary Figure 8. GATA6<sup>low</sup> cells are insensitive to 5-FU.** (A) WB showing the expression of GATA6 in the TKCC cells. GAPDH was used as loading control. (B-D) Scatter plots showing cell survival upon treatment with the indicated doses of 5-FU (B), gemcitabine (C), and paclitaxel (D), plotted against GATA6 protein level. Red square indicates the dose/drug showing significant correlation. Survival was normalized against DMSO-treated cells. Data are presented as median value of at least three independent experiments.

**Supplementary Figure 9. GATA6 modulation does not change drug sensitivity of PaTu8988S and L3.6pl cells.** (A) Western blot showing the extent of GATA6 overexpression and knock-down. Vinculin was used as loading control. (B) Survival of the indicated cells after treatment with increasing doses of either 5-FU or gemcitabine.

**Supplementary Figure 10. GATA6 modulation does not change drug sensitivity of TKCC cells.** (A) Western blot showing the extent of GATA6 overexpression and knock-down. GAPDH was used as loading control. (B) Survival of the indicated cells after treatment with increasing doses of either 5-FU or gemcitabine.

## Supplementary Tables

**Supplementary Table 1**

| Gene Set Name                                    | p-value  | FDR q-value |
|--------------------------------------------------|----------|-------------|
| KEGG_MAPK_SIGNALING_PATHWAY                      | 0.00E+00 | 0.00E+00    |
| <b>KEGG_REGULATION_OF_ACTIN_CYTOSKELETON</b>     | 0.00E+00 | 0.00E+00    |
| KEGG_HUNTINGTONS_DISEASE                         | 0.00E+00 | 0.00E+00    |
| KEGG_PATHWAYS_IN_CANCER                          | 0.00E+00 | 0.00E+00    |
| KEGG_AXON_GUIDANCE                               | 0.00E+00 | 0.00E+00    |
| KEGG_INSULIN_SIGNALING_PATHWAY                   | 0.00E+00 | 0.00E+00    |
| KEGG_CELL_CYCLE                                  | 0.00E+00 | 0.00E+00    |
| KEGG_UBIQUITIN_MEDIATED_PROTEOLYSIS              | 0.00E+00 | 0.00E+00    |
| KEGG_P53_SIGNALING_PATHWAY                       | 0.00E+00 | 0.00E+00    |
| KEGG_RIBOSOME                                    | 0.00E+00 | 0.00E+00    |
| KEGG_CHRONIC_MYELOID_LEUKEMIA                    | 0.00E+00 | 0.00E+00    |
| KEGG_NEUROTROPHIN_SIGNALING_PATHWAY              | 1.11E-16 | 1.59E-15    |
| KEGG_LYSOSOME                                    | 1.11E-16 | 1.59E-15    |
| KEGG_ENDOCYTOSIS                                 | 2.22E-16 | 2.95E-15    |
| KEGG_ALZHEIMERS_DISEASE                          | 3.33E-16 | 4.13E-15    |
| KEGG_PROSTATE_CANCER                             | 1.44E-15 | 1.68E-14    |
| <b>KEGG_FOCAL_ADHESION</b>                       | 1.78E-15 | 1.94E-14    |
| <b>KEGG_WNT_SIGNALING_PATHWAY</b>                | 2.78E-15 | 2.87E-14    |
| KEGG_RENAL_CELL_CARCINOMA                        | 3.00E-15 | 2.93E-14    |
| <b>KEGG_ERBB_SIGNALING_PATHWAY</b>               | 4.00E-15 | 3.72E-14    |
| KEGG_SMALL_CELL_LUNG_CANCER                      | 7.11E-15 | 6.29E-14    |
| KEGG_APOPTOSIS                                   | 4.03E-14 | 3.41E-13    |
| KEGG_FC_GAMMA_R_MEDIATED_PHAGOCYTOSIS            | 2.42E-13 | 1.95E-12    |
| KEGG_GLIOMA                                      | 8.30E-13 | 6.43E-12    |
| KEGG_PANCREATIC_CANCER                           | 1.22E-12 | 9.08E-12    |
| KEGG_T_CELL_RECEPTOR_SIGNALING_PATHWAY           | 2.18E-12 | 1.56E-11    |
| KEGG_OOCYTE_MEIOSIS                              | 3.11E-12 | 2.14E-11    |
| KEGG_PURINE_METABOLISM                           | 7.90E-12 | 5.25E-11    |
| KEGG_PARKINSONS_DISEASE                          | 9.35E-12 | 5.99E-11    |
| KEGG_SPLICEOSOME                                 | 9.85E-12 | 6.11E-11    |
| <b>KEGG_ADHERENS_JUNCTION</b>                    | 1.04E-11 | 6.22E-11    |
| KEGG_RNA_DEGRADATION                             | 1.77E-11 | 1.01E-10    |
| KEGG_DNA_REPLICATION                             | 1.79E-11 | 1.01E-10    |
| KEGG_AMINO_SUGAR_AND_NUCLEOTIDE_SUGAR_METABOLISM | 2.83E-11 | 1.46E-10    |
| KEGG_LYSINE_DEGRADATION                          | 2.83E-11 | 1.46E-10    |
| KEGG_NUCLEOTIDE_EXCISION_REPAIR                  | 2.83E-11 | 1.46E-10    |
| KEGG_N_GLYCAN_BIOSYNTHESIS                       | 8.67E-11 | 4.36E-10    |
| KEGG_PYRIMIDINE_METABOLISM                       | 2.27E-10 | 1.11E-09    |
| KEGG_COLORECTAL_CANCER                           | 4.38E-10 | 2.09E-09    |



|                                        |          |          |
|----------------------------------------|----------|----------|
| KEGG_BASE_EXCISION_REPAIR              | 9.95E-10 | 4.63E-09 |
| KEGG_LONG_TERM_POTENTIATION            | 1.63E-09 | 7.42E-09 |
| KEGG_PYRUVATE_METABOLISM               | 1.94E-09 | 8.57E-09 |
| KEGG_VEGF_SIGNALING_PATHWAY            | 2.51E-09 | 1.09E-08 |
| <b>KEGG_TIGHT_JUNCTION</b>             | 2.77E-09 | 1.17E-08 |
| KEGG_AMINOACYL_TRNA_BIOSYNTHESIS       | 3.26E-09 | 1.35E-08 |
| KEGG_JAK_STAT_SIGNALING_PATHWAY        | 6.37E-09 | 2.58E-08 |
| KEGG_ACUTE_MYELOID_LEUKEMIA            | 6.94E-09 | 2.75E-08 |
| KEGG_B_CELL_RECEPTOR_SIGNALING_PATHWAY | 8.92E-09 | 3.46E-08 |
| KEGG_MELANOMA                          | 1.19E-08 | 4.39E-08 |
| <b>KEGG_TGF_BETA_SIGNALING_PATHWAY</b> | 1.19E-08 | 4.39E-08 |

**Supplementary Table 2**

| GSE7599   |                    |            |
|-----------|--------------------|------------|
| Patient   | GATA6 SMAD4        |            |
| GSM183763 | AMPLIFICATION LOSS |            |
| GSM183779 | GAIN GAIN          |            |
| GSM183764 |                    |            |
| GSM183780 |                    | LOSS       |
| GSM183765 |                    |            |
| GSM183781 |                    | LOSS       |
| GSM183766 | LOSS               | ind        |
| GSM183782 |                    |            |
| GSM183767 |                    |            |
| GSM183783 | GAIN GAIN          |            |
| GSM183768 |                    |            |
| GSM183784 | GAIN GAIN          |            |
| GSM183769 | LOSS GAIN          | ind        |
| GSM183785 | GAIN GAIN          |            |
| GSM183770 |                    | GAIN       |
| GSM183786 | LOSS GAIN          | ind        |
| GSM183778 |                    |            |
| GSM183792 |                    |            |
| GSM183771 | GAIN LOSS          |            |
| GSM183787 | LOSS LOSS          | Chr18 loss |
| GSM183772 | GAIN LOSS          |            |
| GSM183788 | AMPLIFICATION LOSS |            |
| GSM183773 |                    |            |
| GSM183789 | LOSS LOSS          | Chr18 loss |
| GSM183774 |                    |            |
| GSM183790 | GAIN LOSS          |            |
| GSM183775 |                    |            |
| GSM183791 | LOSS LOSS          | ind        |
| GSM183776 | AMPLIFICATION LOSS |            |
| GSM183777 |                    | GAIN       |

| GSE25273  |               |        |
|-----------|---------------|--------|
| Patient   | GATA6 SMAD4   |        |
| GSM621863 |               |        |
| GSM621873 |               | LOSS   |
| GSM621878 | AMPLIFICATION | LOSS   |
| GSM621883 |               |        |
| GSM621888 | LOSS          | LOSS 1 |

|           |  |  |            |
|-----------|--|--|------------|
|           |  |  | event      |
| GSM621910 |  |  |            |
| GSM621917 |  |  | ind        |
| GSM621922 |  |  |            |
| GSM621927 |  |  |            |
| GSM621855 |  |  |            |
| GSM621866 |  |  |            |
| GSM621874 |  |  |            |
| GSM621879 |  |  | Chr18 loss |
| GSM621884 |  |  |            |
| GSM621889 |  |  |            |
| GSM621913 |  |  |            |
| GSM621918 |  |  | Chr18 loss |
| GSM621923 |  |  |            |
| GSM621928 |  |  |            |
| GSM621857 |  |  |            |
| GSM621869 |  |  |            |
| GSM621875 |  |  |            |
| GSM621880 |  |  | event      |
| GSM621885 |  |  |            |
| GSM621907 |  |  | event      |
| GSM621914 |  |  |            |
| GSM621919 |  |  |            |
| GSM621924 |  |  |            |
| GSM621929 |  |  |            |
| GSM621858 |  |  |            |
| GSM621871 |  |  |            |
| GSM621876 |  |  |            |
| GSM621881 |  |  |            |
| GSM621886 |  |  | Chr18 loss |
| GSM621908 |  |  |            |
| GSM621915 |  |  |            |
| GSM621920 |  |  |            |
| GSM621925 |  |  |            |
| GSM621930 |  |  |            |
| GSM621861 |  |  | Chr18 loss |
| GSM621872 |  |  |            |
| GSM621877 |  |  |            |
| GSM621882 |  |  |            |
| GSM621887 |  |  | ind        |
| GSM621909 |  |  |            |
| GSM621916 |  |  |            |

E-MTAB-570

| Patient       | GATA6 | SMAD4 |                     |
|---------------|-------|-------|---------------------|
| X70077_17846  |       |       | Chr18 loss<br>event |
| X70078_17982  |       |       |                     |
| X70092_17848  |       |       |                     |
| X70093_17904  |       |       |                     |
| X70094_17936  |       |       |                     |
| X70095_18397  |       |       |                     |
| X70096_18610  |       |       |                     |
| X70099_17653  |       |       |                     |
| X70100_17719  |       |       |                     |
| X70101_17724  |       |       |                     |
| X70385_18647  |       |       |                     |
| X70386_18812  |       |       |                     |
| X73392_13773  |       |       |                     |
| X73393_13900  |       |       |                     |
| X73394_14122  |       |       |                     |
| X73395_14233  |       |       |                     |
| X73396_14288  |       |       |                     |
| X73437_19286  |       |       |                     |
| X73438_20219  |       |       |                     |
| X73439_14293  |       |       |                     |
| X73440_14462  |       |       |                     |
| X73441_14558  |       |       |                     |
| X73442_14563  |       |       |                     |
| X73443_18459  |       |       |                     |
| X73447_17917W |       |       |                     |
| X73453_18574  |       |       |                     |
| X73454_18978  |       |       |                     |
| X73455_19096  |       |       |                     |
| X73485_14482W |       |       |                     |
| X73486_17582W |       |       |                     |
| X73500_17994W |       |       |                     |
| X73501_18169W |       |       |                     |
| X73502_18446W |       |       |                     |
| X73503_18520W |       |       |                     |
| X73504_18708W |       |       |                     |
| X73510_19045W |       |       |                     |
| X73535_13659W |       |       |                     |
| X73542_20220  |       |       |                     |
| X73553_18177W |       |       |                     |

**Supplementary Table 3**

| Gene sets enriched among genes: UP IN GATA6 <sup>low</sup> TUMORS | NES      | FDR q-val |
|-------------------------------------------------------------------|----------|-----------|
| SCHUETZ_BREAST_CANCER_DUCTAL_INVASIVE_UP                          | 4.39354  | 0         |
| <b>CHARAFE_BREAST_CANCER_LUMINAL_VS_MESENCHYMAL_DN</b>            | 4.085699 | 0         |
| REN_ALVEOLAR_RHABDOMYOSARCOMA_DN                                  | 3.33621  | 0         |
| LINDGREN_BLADDER_CANCER_CLUSTER_2B                                | 3.335549 | 0         |
| WONG_ADULT_TISSUE_STEM_MODULE                                     | 3.264754 | 0         |
| BOQUEST_STEM_CELL_UP                                              | 3.117363 | 0         |
| NABA_MATRISOME                                                    | 3.032401 | 0         |
| LIM_MAMMARY_STEM_CELL_UP                                          | 2.955634 | 1.88E-04  |
| BROWNE_HCMV_INFECTION_48HR_DN                                     | 2.949659 | 1.67E-04  |
| GRUETZMANN_PANCREATIC_CANCER_UP                                   | 2.762412 | 3.20E-04  |
| <b>CHARAFE_BREAST_CANCER_LUMINAL_VS_BASAL_DN</b>                  | 2.750357 | 2.91E-04  |
| <b>SMID_BREAST_CANCER_LUMINAL_B_DN</b>                            | 2.574913 | 6.84E-04  |
| VERHAAK_GLIOBLASTOMA_MESENCHYMAL                                  | 2.510614 | 9.20E-04  |
| LEI_MYB_TARGETS                                                   | 2.502392 | 0.00108   |
| MILI_PSEUDOPODIA_HAPTOTAXIS_DN                                    | 2.440912 | 0.00192   |
| DACOSTA_UV_RESPONSE_VIA_ERCC3_DN                                  | 2.378595 | 0.002241  |
| BRUINS_UVC_RESPONSE_LATE                                          | 2.32499  | 0.003478  |
| <b>SMID_BREAST_CANCER_BASAL_UP</b>                                | 2.219426 | 0.007682  |
| KRIEG_HYPOXIA_NOT_VIA_KDM3A                                       | 2.18173  | 0.009221  |

Supplementary Table 4

|                                  |              | ALL PATIENTS |             | GATA6 (three categories) |             |        |             |      |             | p-value* |
|----------------------------------|--------------|--------------|-------------|--------------------------|-------------|--------|-------------|------|-------------|----------|
|                                  |              |              |             | LOW                      |             | MEDIUM |             | HIGH |             |          |
|                                  |              | N            | (%)         | N                        | (%)         | N      | (%)         | N    | (%)         |          |
| Characteristics                  |              |              |             |                          |             |        |             |      |             |          |
| Number                           |              | 59           | 100.0       | 12                       | 20.3        | 21     | 35.6        | 26   | 44.1        |          |
| Gender                           |              |              |             |                          |             |        |             |      | 0.884       |          |
|                                  | Male         | 37           | 62.7        | 7                        | 58.3        | 14     | 66.7        | 16   | 61.5        |          |
|                                  | Female       | 22           | 37.3        | 5                        | 41.7        | 7      | 33.3        | 10   | 38.5        |          |
| Age at diagnosis                 |              |              |             |                          |             |        |             |      | 0.628       |          |
|                                  | Mean (SD)    | 59           | 65,1 (10,7) | 12                       | 62,9 (10,6) | 21     | 64,6 (11,3) | 26   | 66,5 (10,6) |          |
|                                  | Min - Max    |              | 42 - 87     |                          | 45 - 84     |        | 45 - 84     |      | 42 - 87     |          |
| Tumor site                       |              |              |             |                          |             |        |             |      | 0.227       |          |
|                                  | Head&Isthmus | 36           | 61.0        | 7                        | 58.3        | 16     | 76.2        | 13   | 50.0        |          |
|                                  | Body         | 6            | 10.2        | 0                        | 0.0         | 2      | 9.5         | 4    | 15.4        |          |
|                                  | Tail         | 17           | 28.8        | 5                        | 41.7        | 3      | 14.3        | 9    | 34.6        |          |
| Histology                        |              |              |             |                          |             |        |             |      |             |          |
|                                  | ADK          |              |             |                          |             |        |             |      | 0.203       |          |
|                                  | Positive     | 58           | 98.3        | 11                       | 91.7        | 21     | 100.0       | 26   | 100.0       |          |
|                                  | Negative     | 1            | 1.7         | 1                        | 8.3         | 0      | 0.0         | 0    | 0.0         |          |
| Others malignant                 |              |              |             |                          |             |        |             |      | 0.075       |          |
|                                  | Positive     | 4            | 8.3         | 1                        | 11.1        | 3      | 18.8        | 0    | 0.0         |          |
|                                  | Negative     | 44           | 91.7        | 8                        | 88.9        | 13     | 81.2        | 23   | 100.0       |          |
|                                  | missings     | 11           | 18.6        | 3                        | 25.0        | 5      | 23.8        | 3    | 11.5        |          |
| Grade of ADK (only for ADK==yes) |              |              |             |                          |             |        |             |      | 0.394       |          |
|                                  | Well         | 8            | 19.5        | 1                        | 16.7        | 4      | 33.3        | 3    | 13.0        |          |
|                                  | Intermediate | 18           | 43.9        | 4                        | 66.7        | 3      | 25.0        | 11   | 47.8        |          |
|                                  | Poor         | 15           | 36.6        | 1                        | 16.7        | 5      | 41.7        | 9    | 39.1        |          |
|                                  | missings     | 13           | 24.1        | 4                        | 40.0        | 6      | 33.3        | 3    | 11.5        |          |
| Tumor resected                   |              |              |             |                          |             |        |             |      | 0.096       |          |
|                                  | Yes          | 32           | 54.2        | 4                        | 33.3        | 10     | 47.6        | 18   | 69.2        |          |
|                                  | No           | 27           | 45.8        | 8                        | 66.7        | 11     | 52.4        | 8    | 30.8        |          |
| Size <sup>§</sup>                |              |              |             |                          |             |        |             |      | 0.506       |          |
|                                  | Mean (SD)    | 31           | 3,1 (0,9)   | 4                        | 3,5 (0,7)   | 9      | 3,2 (0,8)   | 18   | 2,9 (1,0)   |          |
|                                  | Min - Max    |              | 14 - 45     |                          | 3 - 4,5     |        | 2,0 - 4,5   |      | 0,5 - 5     |          |
|                                  | missings     | 1            |             | 0                        |             | 1      |             | 0    |             |          |
| T Stage <sup>§</sup>             |              |              |             |                          |             |        |             |      | 0.184       |          |
|                                  | T1           | 0            | 0.0         | 0                        | 0.0         | 0      | 0.0         | 0    | 0.0         |          |
|                                  | T2           | 0            | 0.0         | 0                        | 0.0         | 0      | 0.0         | 0    | 0.0         |          |
|                                  | T3           | 30           | 93.8        | 4                        | 100.0       | 8      | 80.0        | 18   | 100.0       |          |
|                                  | T4           | 2            | 6.2         | 0                        | 0.0         | 2      | 20.0        | 0    | 0.0         |          |
| N Stage <sup>§</sup>             |              |              |             |                          |             |        |             |      | 0.443       |          |

|                     |          |    |      |    |       |    |      |    |      |       |
|---------------------|----------|----|------|----|-------|----|------|----|------|-------|
|                     | Positive | 26 | 81.2 | 4  | 100.0 | 9  | 90.0 | 13 | 72.2 |       |
|                     | Negative | 6  | 18.8 | 0  | 0.0   | 1  | 10.0 | 5  | 27.8 |       |
| <b>Chemotherapy</b> |          |    |      |    |       |    |      |    |      |       |
| <b>Gemzar</b>       |          |    |      |    |       |    |      |    |      | 0.118 |
|                     | Yes      | 26 | 44.8 | 3  | 25.0  | 8  | 38.1 | 15 | 60.0 |       |
|                     | No       | 32 | 55.2 | 9  | 75.0  | 13 | 61.9 | 10 | 40.0 |       |
|                     | missing  | 1  | 1.7  | 0  | 0.0   | 0  | 0.0  | 1  | 3.8  |       |
| <b>Folfirinox</b>   |          |    |      |    |       |    |      |    |      | 0.112 |
|                     | Yes      | 20 | 34.5 | 6  | 5.0   | 12 | 57.1 | 20 | 80.0 |       |
|                     | No       | 38 | 65.5 | 6  | 50.0  | 9  | 42.9 | 5  | 20.0 |       |
|                     | missing  | 1  | 1.7  | 0  | 0.0   | 0  | 0.0  | 1  | 3.8  |       |
| <b>Other</b>        |          |    |      |    |       |    |      |    |      | 1.000 |
|                     | Yes      | 9  | 15.5 | 2  | 16.7  | 3  | 14.3 | 4  | 16.0 |       |
|                     | No       | 49 | 84.5 | 10 | 83.3  | 18 | 85.7 | 21 | 84.0 |       |
|                     | missing  | 1  | 1.7  | 0  | 0.0   | 0  | 0.0  | 1  | 3.8  |       |

---

\* *p*-value, Fisher's test for qualitative variables. One-way ANOVA test for age and tumor size.

§ Data available only for resected patients N=32

**Supplementary Table 5**

|                                        |          | <b>ALL<br/>PATIENTS</b> | <b>GATA6 score<br/>median (IQR)</b> | <b>GATA6<br/>LOW</b> | <b>GATA6<br/>MEDIUM</b> | <b>GATA6<br/>HIGH</b> | <b>P value</b> |
|----------------------------------------|----------|-------------------------|-------------------------------------|----------------------|-------------------------|-----------------------|----------------|
| <b>Resection<br/>Margin</b>            | Negative | 169                     | 205 (157-260)                       | 19                   | 60                      | 90                    | 0.353          |
|                                        | Positive | 144                     | 188 (143-253)                       | 18                   | 61                      | 65                    |                |
| <b>Lymph Node<br/>Status</b>           | Negative | 61                      | 223 (157-265)                       | 6                    | 19                      | 36                    | 0.254          |
|                                        | Positive | 252                     | 190 (148-250)                       | 31                   | 102                     | 119                   |                |
| <b>Stage</b>                           | 1        | 17                      | 223 (140-260)                       | 2                    | 5                       | 10                    | 0.338          |
|                                        | 2        | 76                      | 213 (171-275)                       | 7                    | 24                      | 45                    |                |
|                                        | 3        | 209                     | 190 (145-245)                       | 24                   | 90                      | 95                    |                |
|                                        | 4        | 8                       | 217 (113-265)                       | 2                    | 2                       | 4                     |                |
| <b>Tumour<br/>Grade</b>                | Well     | 21                      | 185 (155-250)                       | 3                    | 8                       | 10                    | 0.005          |
|                                        | Moderate | 206                     | 210 (160-260)                       | 16                   | 74                      | 116                   |                |
|                                        | Poor     | 79                      | 180 (103-227)                       | 16                   | 36                      | 27                    |                |
| <b>Local<br/>Invasion</b>              | No       | 165                     | 205 (157-257)                       | 18                   | 59                      | 88                    | 0.422          |
|                                        | Yes      | 146                     | 190 (145-253)                       | 18                   | 61                      | 67                    |                |
| <b>Maximum<br/>Tumour<br/>diameter</b> | <30mm    | 135                     | 190 (148-260)                       | 13                   | 57                      | 65                    | 0.481          |
|                                        | ≥30mm    | 160                     | 196 (148-253)                       | 22                   | 60                      | 78                    |                |
| <b>Diabetes</b>                        | No       | 238                     | 192 (150-255)                       | 25                   | 97                      | 116                   | 0.329          |
|                                        | IDDM     | 66                      | 203 (143-260)                       | 10                   | 21                      | 35                    |                |
| <b>Gender</b>                          | Male     | 178                     | 196 (148-255)                       | 23                   | 69                      | 86                    | 0.761          |
|                                        | Female   | 125                     | 200 (150-258)                       | 14                   | 52                      | 69                    |                |
| <b>Age (Years)</b>                     | <64      | 156                     | 199 (144-260)                       | 22                   | 56                      | 78                    | 0.368          |
|                                        | ≥64      | 157                     | 197 (160-252)                       | 15                   | 65                      | <b>77</b>             |                |



**Supplementary Table 6**

| Characteristic               |                    | Chemotherapy                    |             | Total      |
|------------------------------|--------------------|---------------------------------|-------------|------------|
|                              |                    | 5-Fluorouracil/<br>folinic acid | Gemcitabine |            |
|                              |                    | N=150                           | N=163       | N=313      |
| Age Median (IQR) years       |                    | 62 (55-70)                      | 64 (56-70)  | 64 (57-70) |
| Sex                          | Female             | 66 (44%)                        | 69 (42%)    | 135 (43%)  |
|                              | Male               | 84 (56%)                        | 94 (58%)    | 178 (57%)  |
| Baseline Performance Score   | 0                  | 57 (38%)                        | 55 (34%)    | 112 (36%)  |
|                              | 1                  | 79 (53%)                        | 89 (55%)    | 168 (54%)  |
|                              | 2                  | 14 (9%)                         | 19 (12%)    | 33 (11%)   |
| Diabetic                     | No                 | 114 (79%)                       | 124 (78%)   | 238 (78%)  |
|                              | NIDDM              | 11 (8%)                         | 13 (8%)     | 24 (8%)    |
|                              | IDDM               | 19 (13%)                        | 23 (14%)    | 42 (14%)   |
| Smoking status               | Never              | 60 (43%)                        | 63 (43%)    | 123 (43%)  |
|                              | Past               | 52 (37%)                        | 60 (41%)    | 112 (39%)  |
|                              | Present            | 27 (19%)                        | 25 (17%)    | 52 (18%)   |
| Post-operative complications | No                 | 114 (77%)                       | 126 (78%)   | 240 (77%)  |
|                              | Yes                | 34 (23%)                        | 36 (22%)    | 70 (23%)   |
| Hospital stay                | Number             | 139                             | 153         | 292        |
| Median (IQR) days            |                    | 13 (10-18)                      | 13 (10-17)  | 13 (10-17) |
| Post-Op. CA 19-9             | Number             | 114                             | 117         | 231        |
| Median (IQR) KU/l            |                    | 34 (11-81)                      | 25 (11-60)  | 28 (11-71) |
| Surgery to Randomisation     |                    |                                 |             |            |
| Median (IQR) days            |                    | 49 (35-62)                      | 50 (38-61)  | 49 (37-61) |
| Surgery                      | Whipples resection | 78 (53%)                        | 82 (51%)    | 160 (52%)  |
|                              | Pylorus Preserving | 57 (39%)                        | 66 (41%)    | 123 (40%)  |

|                                    |                             |            |            |            |
|------------------------------------|-----------------------------|------------|------------|------------|
|                                    | <b>Total Pancreatectomy</b> | 6 (4%)     | 4 (2%)     | 10 (3%)    |
|                                    | <b>Distal Panc.</b>         | 7 (5%)     | 10 (6%)    | 17 (5%)    |
| <b>Extent of resection</b>         | <b>Standard</b>             | 116 (81%)  | 110 (69%)  | 226 (75%)  |
|                                    | <b>Radical resection</b>    | 17 (12%)   | 27 (17%)   | 44 (15%)   |
|                                    | <b>Extended radical</b>     | 11 (8%)    | 22 (14%)   | 33 (11%)   |
| <b>Maximum tumour diameter, mm</b> |                             | 27 (22-35) | 30 (22-40) | 30 (22-37) |
| <b>Median (IQR)</b>                |                             |            |            |            |
| <b>Tumour grade</b>                | <b>Well</b>                 | 8 (5%)     | 13 (8%)    | 21 (7%)    |
|                                    | <b>Moderately</b>           | 98 (67%)   | 108 (68%)  | 206 (67%)  |
|                                    | <b>Poorly</b>               | 41 (28%)   | 38 (24%)   | 79 (26%)   |
| <b>Lymph node invasion</b>         | <b>Negative</b>             | 30 (20%)   | 31 (19%)   | 61 (19%)   |
|                                    | <b>Positive</b>             | 120 (80%)  | 132 (81%)  | 252 (81%)  |
| <b>Resection margins</b>           | <b>Negative</b>             | 74 (49%)   | 95 (58%)   | 269 (54%)  |
|                                    | <b>Positive</b>             | 76 (51%)   | 68 (42%)   | 144 (46%)  |
| <b>Local Invasion</b>              | <b>No</b>                   | 83 (56%)   | 85 (52%)   | 1688 (54%) |
|                                    | <b>Yes</b>                  | 65 (44%)   | 77 (48%)   | 142 (46%)  |
| <b>Tumour stage</b>                | <b>I</b>                    | 10 (7%)    | 7 (4%)     | 17 (5%)    |
|                                    | <b>II</b>                   | 35 (23%)   | 41 (25%)   | 76 (25%)   |
|                                    | <b>III</b>                  | 97 (65%)   | 112 (70%)  | 209 (67%)  |
|                                    | <b>IVa</b>                  | 7 (5%)     | 1 (1%)     | 8 (3%)     |

**Supplementary Table 7**

|                   |            | Hazard Ratio (95% Confidence Interval) |                                     |                                      |
|-------------------|------------|----------------------------------------|-------------------------------------|--------------------------------------|
|                   |            | Chemotherapy                           |                                     | Total                                |
| Characteristic    |            | 5-fluorouracil /folinic acid           | Gemcitabine                         |                                      |
| Resection Margin  |            | N=150                                  | N=163                               | N=313                                |
|                   | Negative   | 1                                      | 1                                   | 1                                    |
|                   | Positive   | 1.54 (1.27-2.66)                       | 1.26 (0.90-1.78)                    | 1.52 (1.18-1.94),                    |
|                   |            | Wald $\chi^2 = 10.38$ ,<br>$P=0.001$   | Wald $\chi^2 = 1.78$ ,<br>$P=0.182$ | Wald $\chi^2 = 10.76$ ,<br>$P=0.001$ |
| Lymph Node Status |            | N=150                                  | N=163                               | N=313                                |
|                   | Negative   | 1                                      | 1                                   | 1                                    |
|                   | Positive   | 2.41 (1.45-3.99)                       | 1.73 (1.08-2.75)                    | 2.05 (1.45-2.89)                     |
|                   |            | Wald $\chi^2 = 11.55$ ,<br>$P=0.001$   | Wald $\chi^2 = 5.27$ ,<br>$P=0.022$ | Wald $\chi^2 = 16.75$ ,<br>$P<0.001$ |
| Stage             |            | N=149                                  | N=161                               | N=310                                |
|                   | 2-Jan      | 1                                      | 1                                   | 1                                    |
|                   | 4-Mar      | 1.50 (1.00-2.25)                       | 1.45 (0.99-2.12)                    | 1.48 (1.12-1.95)                     |
|                   |            | Wald $\chi^2 = 3.91$ ,<br>$P=0.048$    | Wald $\chi^2 = 3.63$ ,<br>$P=0.057$ | Wald $\chi^2 = 7.57$ ,<br>$P=0.006$  |
| Tumour Grade      |            | N=147                                  | N=159                               | N=306                                |
|                   | Well       | 1                                      | 1                                   | 1                                    |
|                   | Moderately | 0.98 (0.43-2.24)                       | 1.05 (0.56-1.96)                    | 1.03 (0.63-1.70)                     |
|                   | Poorly     | 1.05 (0.43-2.52)                       | 1.51 (0.76-2.99)                    | 1.27 (0.74-2.17)                     |
|                   |            | Wald $\chi^2 = 0.10$ ,<br>$P=0.951$    | Wald $\chi^2 = 3.34$ ,<br>$P=0.188$ | Wald $\chi^2 = 2.13$ ,<br>$P=0.344$  |
| Local Invasion    |            | N=149                                  | N=162                               | N=311                                |

|                         |        |                                        |                                 |                                         |
|-------------------------|--------|----------------------------------------|---------------------------------|-----------------------------------------|
|                         | No     | 1                                      | 1                               | 1                                       |
|                         | Yes    | 1.79 (1.24-2.59)                       | 1.30 (0.92-1.83)                | 1.52 (1.19-1.95)                        |
|                         |        | Wald $\chi^2=9.51$ ,<br><b>P=0.002</b> | Wald $\chi^2=2.27$ ,<br>P=0.132 | Wald $\chi^2=10.86$ ,<br><b>P=0.001</b> |
| Maximum Tumour diameter |        | N=142                                  | N=153                           | N=295                                   |
|                         | <30mm  | 1                                      | 1                               | 1                                       |
|                         | ≥30mm  | 1.35 (0.93-1.96)                       | 1.38 (0.96-1.98)                | 1.36 (1.05-1.76)                        |
|                         |        | Wald $\chi^2=2.55$ ,<br>P=0.111        | Wald $\chi^2=3.08$ ,<br>P=0.079 | Wald $\chi^2=5.51$ ,<br><b>P=0.019</b>  |
| Diabetes mellitus       |        | N=144                                  | N=160                           | N=304                                   |
|                         | No     | 1                                      | 1                               | 1                                       |
|                         | Yes    | 1.02 (0.65-1.61)                       | 1.03 (0.68-1.57)                | 1.03 (0.75-1.40)                        |
|                         |        | Wald $\chi^2=0.01$ ,<br>P=0.933        | Wald $\chi^2=0.02$ ,<br>P=0.879 | Wald $\chi^2=0.03$ ,<br>P=0.870         |
| Gender                  |        | N=150                                  | N=163                           | N=313                                   |
|                         | Male   | 1                                      | 1                               | 1                                       |
|                         | Female | 1.18 (0.82-1.69)                       | 1.09 (0.78-1.54)                | 1.13 (0.88-1.45)                        |
|                         |        | Wald $\chi^2=0.76$ ,<br>P=0.383        | Wald $\chi^2=0.25$ ,<br>P=0.617 | Wald $\chi^2=0.98$ ,<br>P=0.323         |
| Age, years              |        | N=150                                  | N=163                           | N=313                                   |
|                         | ≥64    | 1                                      | 1                               | 1                                       |
|                         | <64    | 1.48 (1.03-2.14)                       | 1.01 (0.72-1.42)                | 1.22 (0.95-1.56)                        |
|                         |        | Wald $\chi^2=4.38$ ,<br><b>P=0.036</b> | Wald $\chi^2=0.01$ ,<br>P=0.942 | Wald $\chi^2=2.40$ ,<br>P=0.121         |
| Smoking                 |        | N=139                                  | N=148                           | N=287                                   |
|                         | Never  | 1                                      | 1                               | 1                                       |
|                         | Ex     | 1.06 (0.70-1.61)                       | 1.29 (0.87-1.92)                | 1.17 (0.88-1.56)                        |

|  |         |                                     |                                     |                                     |
|--|---------|-------------------------------------|-------------------------------------|-------------------------------------|
|  | Current | 1.04 (0.63-1.71)                    | 1.45 (0.88-2.39)                    | 1.21 (0.85-1.73)                    |
|  |         | Wald $\chi^2 = 0.07$ ,<br>$P=0.964$ | Wald $\chi^2 = 2.68$ ,<br>$P=0.261$ | Wald $\chi^2 = 1.68$ ,<br>$P=0.432$ |
|  |         | N=150                               | N=163                               | N=313                               |
|  | High    | 1                                   | 1                                   | 1                                   |
|  | Medium  | 1.49 (1.01-2.20)                    | 0.97 (0.67-1.39)                    | 1.19 (0.91-1.55)                    |
|  | Low     | 1.73 (0.99-3.03)                    | 0.99 (0.56-1.72)                    | 1.27 (0.86-1.89)                    |
|  |         | Wald $\chi^2 = 5.72$ ,<br>$P=0.057$ | Wald $\chi^2 = 0.04$ ,<br>$P=0.982$ | Wald $\chi^2 = 2.38$ ,<br>$P=0.304$ |
|  |         | N=139                               | N=139                               | N=278                               |
|  | neg     | 1                                   | 1                                   | 1                                   |
|  | pos     | 1.09 (0.71-1.67)                    | 1.11 (0.70-1.74)                    | 1.10 (0.81-1.49)                    |
|  |         | Wald $\chi^2 = 0.15$ ,<br>$P=0.701$ | Wald $\chi^2 = 0.19$ ,<br>$P=0.660$ | Wald $\chi^2 = 0.34$ ,<br>$P=0.558$ |

**Supplementary Table 8**

|                   |          | 5-fluorouracil /folinic acid<br>(n=139) |               |              | Gemcitabine<br>(n=139) |               |       |
|-------------------|----------|-----------------------------------------|---------------|--------------|------------------------|---------------|-------|
| Variable          |          | HR (95% CI)                             | Wald $\chi^2$ | p            | HR (95% CI)            | Wald $\chi^2$ | P     |
| Resection Margin  | Negative | 1                                       | 6.23          | <b>0.013</b> | 1                      | 0.97          | 0.326 |
|                   | Positive | 1.64<br>(1.11-2.41)                     |               |              | 1.19<br>(0.84-1.69)    |               |       |
| Lymph Node Status | Negative | 1                                       | 6.45          | <b>0.011</b> | 1                      | 1.96          | 0.162 |
|                   | Positive | 2.35<br>(1.22-4.53)                     |               |              | 1.55<br>(0.84-2.88)    |               |       |
| Stage             | 1/2      | 1                                       | 0.26          | 0.609        | 1                      | 0.12          | 0.728 |
|                   | 3/4      | 0.87<br>(0.51-1.48)                     |               |              | 1.09<br>(0.66-1.81)    |               |       |
| Local Invasion    | No       | 1                                       | 4.5           | <b>0.032</b> |                        |               |       |
|                   | Yes      | 1.50<br>(1.04-2.17)                     |               |              |                        |               |       |
| Age               | >=64     | 1                                       | 4.87          | <b>0.027</b> |                        |               |       |
|                   | <64      | 1.55<br>(1.05-2.29)                     |               |              |                        |               |       |
| GATA6_CLASS       | High     | 1                                       | 1.77          | 0.413        | 1                      | 0.02          | 0.992 |
|                   | Medium   | 1.30<br>(0.87-1.95)                     |               |              | 0.97<br>(0.54-1.73)    |               |       |
|                   | Low      | 1.25<br>(0.67-2.32)                     |               |              | 0.98<br>(0.68-1.42)    |               |       |

**Supplementary Table 9**

|                                      | <b><i>GATA6</i></b> | <b><i>KRAS</i></b> | <b><i>CDKN2A</i></b> | <b><i>TP53</i></b> | <b><i>SMAD4</i></b> |
|--------------------------------------|---------------------|--------------------|----------------------|--------------------|---------------------|
| <b>A13B</b>                          | Amplified           | MUT                | <i>HD</i>            | HD                 | WT                  |
| <b>PaTu8988S</b>                     | WT                  | MUT                | <i>HD</i>            | MUT                | HD                  |
| <b>SK-PC-1</b>                       | WT                  | MUT                | <i>HD</i>            | MUT                | HD                  |
| <b>L3.6pl</b>                        | WT                  | MUT                | <i>Meth</i>          | WT                 | HD                  |
|                                      |                     |                    |                      |                    |                     |
| <b>Panc1</b><br>(used in ref.<br>17) | WT                  | MUT                | <i>HD</i>            | MUT                | WT                  |

ref:

Schuhmacher et al. Clin. Can. Res. 1999

Hamidi et al. Br. J. Cancer 2014

Moore et al. Virchows Arch. 2001

Jones et al. Science 2008

**Supplementary Table 10**

| Target protein | Provider        | Cat.<br>Number | Use        |
|----------------|-----------------|----------------|------------|
| GATA6          | R&D             | AF1700         | 1:1000 WB  |
|                |                 |                | 1:1000 IHC |
|                |                 |                | 1 µg/ChIP  |
|                | Santa Cruz      | sc-9055        | 1:200 IF   |
| E-cadherin     | BD Laboratories | 610182         | 1:1000 WB  |
|                |                 |                | 1:1000 IHC |
|                |                 |                | 1:100 IF   |
| vimentin       | Millipore       | AB5733         | 1:100 IF   |
|                | Santa Cruz      | sc-6260        | 1:1000 WB  |
| FOXA1          | Abcam           | ab-23738       | 1:500 WB   |
| FOXA2          | Seven Hills     | WRAB-1200      | 1:2000 IHC |
|                | Santa Cruz      | sc-6554        | 1:500 WB   |
|                |                 |                | 1 µg/ChIP  |
| GAPDH          | Home made       |                | 1:1000 WB  |
| Vinculin       | SIGMA           | V9131          | 1:3000 WB  |
| KRT5           | Covance         | PRB-16P        | 1:500 WB   |
| KRT14          | Covance         | PRB-155P       | 1:500 WB   |
|                |                 |                | 1:1000 IHC |



## Supplementary Table 11

### RT-qPCR

|                 |                          |
|-----------------|--------------------------|
| hCDH1_F         | AGAACGCATTGCCACATACACTC  |
| hCDH1_R         | CATTCTGATCGGTTACCGTGATC  |
| hCLDN1_ex2-3_F  | GTGCTTGGAAGACGATGAGG     |
| hCLDN1_ex2-3_R  | CATACCATGCTGTGGCAACT     |
| hCRB3_F         | TTCTGCAAATGAGAATAGCACTG  |
| hCRB3_R         | GAGGGAGAAGACCACGATGA     |
| hCTNNB1_ex1-2_F | GTCGAGGACGGTCGGACT       |
| hCTNNB1_ex1-2_R | CCATTGTCCACGCTGGATT      |
| hEGFR_ex24-25_F | CCCAAAGTTCCGTGAGTTGA     |
| hEGFR_ex24-25_R | TCGTCCATGTCTTCTTCATCC    |
| hFOXA1_F        | GCTCCAGGATGTTAGGAACTGT   |
| hFOXA1_R        | ATGGTCATGTAGGTGTTTCATGG  |
| hFOXA2_F        | AGCTACTATGCAGAGCCCGA     |
| hFOXA2_R        | TACGTGTTTCATGCCGTTTCAT   |
| hGATA6_F        | GTGCCCAGACCACTTGCTAT     |
| hGATA6_R        | TGGAATTATTGCTATTACCAGAGC |
| hHNF4a_F        | GGCTGCAAGGGCTTCTTC       |
| hHNF4a_R        | GGCACTGGTTCCTCTTGTCT     |
| hHPRT_F         | GGCCAGACTTTGTTGGATTTG    |
| hHPRT_R         | TGCGCTCATCTTAGGCTTTGT    |
| hKRas_ex1-2_F   | TGTGGTAGTTGGAGCTGGTG     |
| hKRas_ex1-2_R   | TCGAGAATATCCAAGAGACAGG   |
| hMAP2K2_ex1-2_F | GCTCACCATCAACCCTACCA     |
| hMAP2K2_ex1-2_R | GTCAAGTTCAGCTCCTCCA      |
| hNFKB1_ex2-3    | TGTTTCATTTGGATCCTTCTTTG  |
| hNFKB1_ex2-3    | ATTTGAAGGTATGGGCCATCT    |
| hRELA_ex1-3_F   | GCGAATGGCTCGTCTGTAGT     |
| hRELA_ex1-3_R   | TCCACATAGGGGCCAGAG       |
| hSNAI1_ex1-2_F  | GCGAGCTGCAGGACTCTAAT     |
| hSNAI1_ex1-2_R  | CGGTGGGGTTGAGGATCT       |
| hSNAI1_F        | CAAGATGCACATCCGAAGC      |
| hSNAI1_R        | CAGTGGGGACAGGAGAAGG      |
| hSOX9_ex2-3_F   | ACTCGCCACACTCCTCCTC      |
| hSOX9_ex2-3_R   | GTCGGTTTTGGGGGTGGT       |
| hTWIST1_F       | ACCCAGTCGCTGAACGAG       |
| hTWIST1_R       | TGGAGGACCTGGTAGAGGAA     |
| hVIM_F          | TCAGAGAGAGGAAGCCGAAA     |
| hVIM_R          | CAAAGATTCCACTTTGCGTTC    |
| hZO1_ex3-4_F    | CAGAGTGGGGAAACGTCAAT     |
| hZO1_ex3-4_R    | CACTTTTCCTTAGTTGCTGAACA  |

### ChIP-qPCR

|                |                           |
|----------------|---------------------------|
| hCDH1 +560bp_F | AGAGGGGCATCCGTAGAAAT      |
| hCDH1 +560bp_R | TCTCCAGTACCCCACTTTCC      |
| hCLDN1_prom_F  | AAACCAGGATTCTCTCATTTC     |
| hCLDN1_prom_R  | TCCCTTATGGGCTCATTCTG      |
| hCRB3_prom2_F  | CCTGGGGGCAAAGTAGGTA       |
| hCRB3_prom2_R  | CCAGATACCCAGCGCTTCTA      |
| hCTNNB1TSS_F   | GCGCCATTTTAAGCCTCTC       |
| hCTNNB1TSS_R   | CTGAAGCTGCTCCTCAGACC      |
| hECAD_TSS_F    | GTGAACCCTCAGCCAATCAG      |
| hECAD_TSS_R    | TCACAGGTGCTTTGCAGTTC      |
| hEGFR_-400_F   | AGAGGGTCCCGTAGTGCTG       |
| hEGFR_-400_R   | AGACTGGCCGAGCCTTAGAG      |
| hGATA6 TSS_F   | TACTGCTCTGCCGAAAACT       |
| hGATA6 TSS_R   | GCAGTTCGACCCACAGC         |
| hHNF4a_TSS_F   | TGGGTGATTAGAAGAATCAATAAGA |
| hHNF4a_TSS_R   | GCTCACAGCAGCAGCACA        |
| hKRAS_TSS2_F   | CCTCAGGGTCGGCCTATAC       |
| hKRAS_TSS2_R   | GTCTCCCTAAGTCCCCGAAG      |
| hMAP2K2_TSS_F  | CCTCGCTTGCCCTTACCAC       |
| hMAP2K2_TSS_R  | ACCTGTGCACGACCATCAC       |
| hNFKB1_TSS_F   | TGGACCGCATGACTCTATCA      |
| hNFKB1_TSS_R   | CTGGAGCCGGTAGGGAAG        |
| hNOTCH1TSS_1_F | GGCGGGGAGAAATGTAAGAG      |
| hNOTCH1TSS_1_R | GAGGGGTTGCGTAAGAAGC       |
| hRELA_prom_F   | CGGATGGGACGACTGAGG        |
| hRELA_prom_R   | ATGAGAGCCGGCAGTTTG        |
| hSNAI1_TSS_F   | GGAGACGAGCCTCCGATT        |
| hSNAI1_TSS_R   | GCCGCCAACTCCCTTAAGTA      |
| hSOX9_intr2_F  | CACAAGTAGCAATTAGGTCTTCC   |
| hSOX9_intr2_R  | GGAGATAAGTCGCCCAATGA      |
| hVIM_prom_F    | AGCCCGCTGAGACTTGAAT       |
| hVIM_prom_R    | GGTGGGGTCGCTTAGTCAC       |
| hZEB1_prom_F   | AGGCGTGGGACTGATGGTAG      |
| hZEB1_prom_R   | ATTCTCCCTGTACCCTGTGC      |
| hZO1_prom_F    | AAGAAAACCCGACCTACTACGC    |
| hZO1_prom_R    | TGCTGTCTTTGGAGGAGTGG      |
| NEG_F          | CATTGGGAAGTGATGATGTGATCT  |
| NEG_R          | GTCTCTCTGCCATCTTCACTCA    |

## SUPPLEMENTARY FIGURES

**Supplementary Figure 1. GATA6 expression in PDAC cells.** (A) RT-qPCR analysis of GATA6 mRNA levels in a panel of PDAC cell lines, relative to HPRT. In red are the cell lines that were used in subsequent experiments. (B) Western blot showing the protein levels of GATA6, E-cadherin, and vimentin. Vinculin was used as loading control.

Supplementary Figure 1

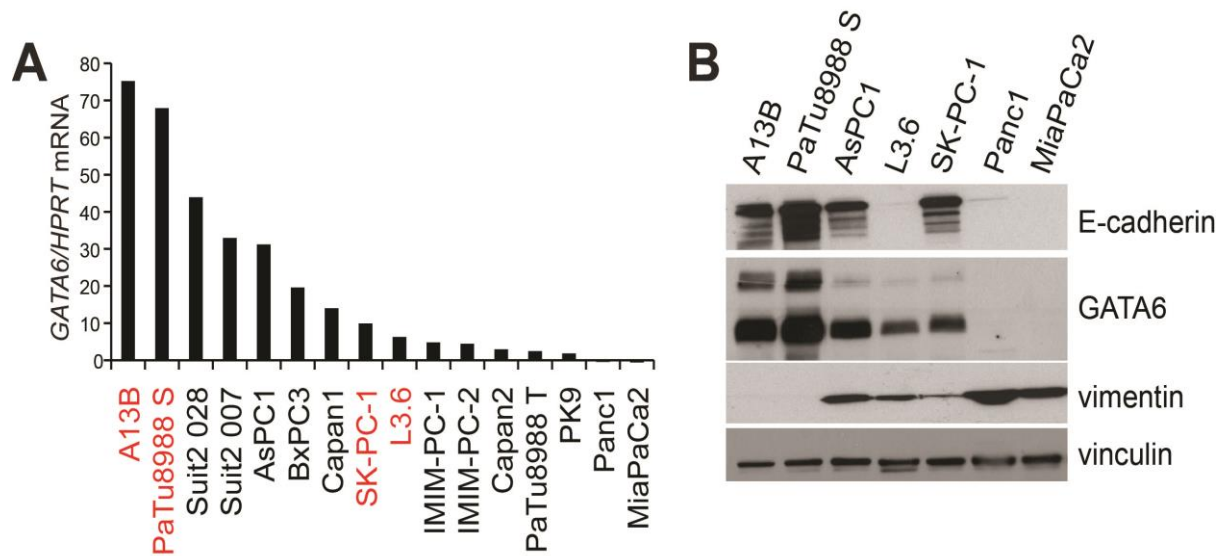

**Supplementary Figure 2. GATA6 knock-down and overexpression.** (A-C) Top: microphotographs showing the PDAC cell lines that were used for GATA6 knock-down experiments. Bottom: GATA6 expression in A13B, PaTu8988S, SK-PC-1 infected with the indicated constructs, measured by RT-qPCR. (D) Expression of GATA6, E-cadherin, and vimentin detected by western blotting in total lysates from A13B and SK-PC-1 cells infected with the indicated constructs. GAPDH was used as a loading control. (E) Quantification of the *in vitro* invasiveness of SK-PC-1 cells infected with the indicated constructs. (F) Microphotograph of parental L3.6pl cells, used for GATA6 overexpression, and (bottom) mRNA levels of GATA6 in L3.6pl cells infected with the indicated constructs. Data are presented as mean $\pm$ s.e.m. of at least three independent experiments; \* $P$ <0.05, \*\* $P$ <0.01.

## Supplementary Figure 2

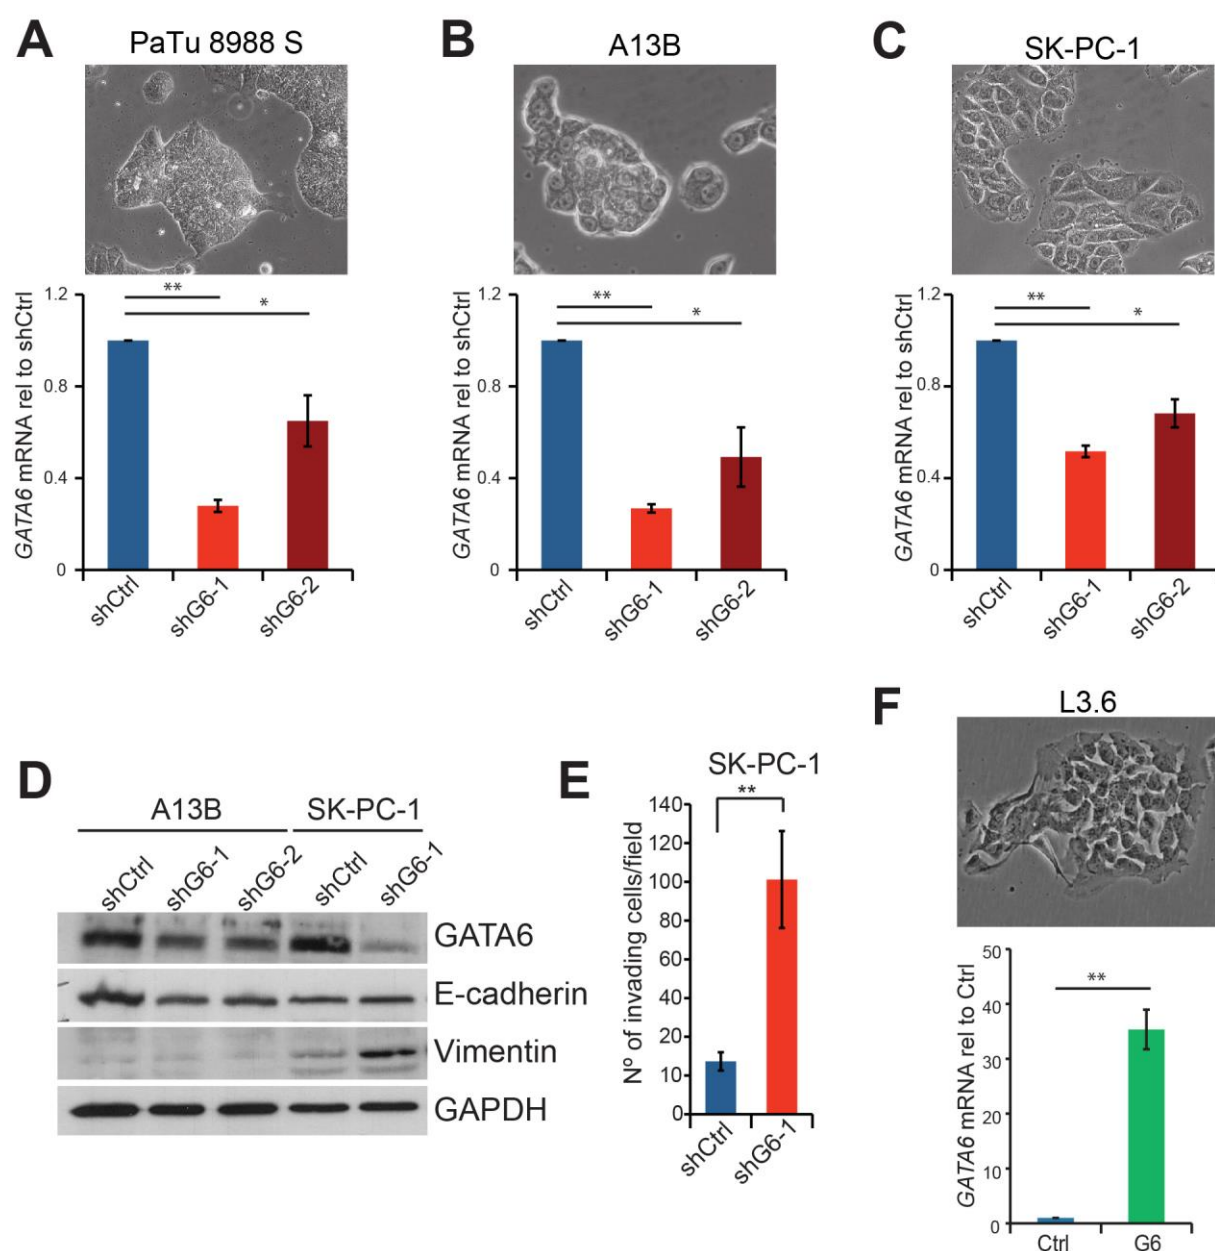

**Supplementary Figure 3. GATA6 expression is lower in metastases compared to primary tumors.** Boxplot showing the expression of GATA6 in normal pancreas (norm, adjacent to PDAC), primary tumors (PDAC), and metastases (met) in the patients' series described by Moffitt et al.  $**P<0.001$

## Supplementary Figure 3

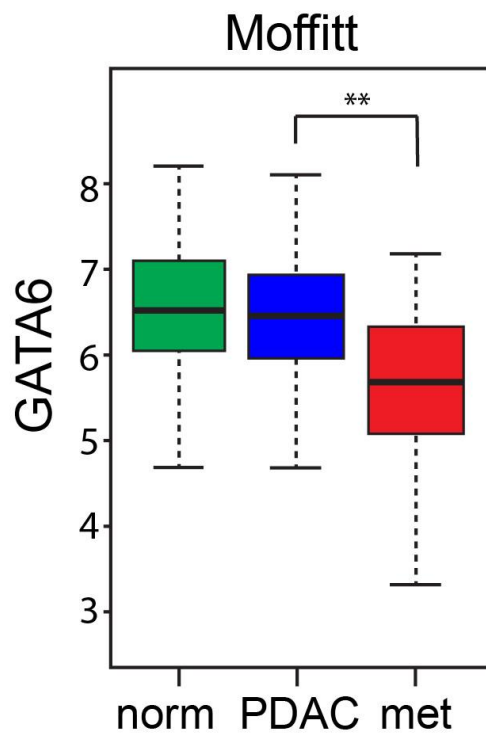

**Supplementary Figure 4. GATA6 ChIP-Seq validation and ChIP analysis of FOXA2 on GATA6 targets.** (A) Top: Representative genomic distribution of GATA6 in a region of human chromosome 14, as displayed in the UCSC genome browser. Tag counts (top-red for GATA6-ChIP and blue for input) and called peaks (bottom) tracks are shown. Bottom: core matrices obtained for the most significantly enriched motifs found in the GATA6 ChIP-Seq peaks. (B) Distribution of GATA6 ChIP-Seq peaks according to their distance from the closest transcription start site (TSS). (C) GATA6 binding to the promoter region of the indicated genes detected by ChIP-qPCR in PaTu8988S cells, represented as % of input chromatin and compared with non-specific IgG binding. Data are shown as mean $\pm$ s.e.m. of at least three independent experiments; \* $P$ <0.05, \*\* $P$ <0.01. (D) Representation of the ChIPSeq peaks found in the promoter of SNAI1, ZEB1, ZEB2, and VIM, as displayed in the UCSC genome browser. Scale bar: 5Mb. (E) FOXA2 binding to the promoter of the indicated genes, selected as GATA6 targets. UP and DOWN refers to the regulation of the corresponding mRNAs in GATA6-silenced PaTu8988S cells. Data are presented as mean $\pm$ s.e.m. of at least three independent experiments; \* $P$ <0.05, \*\* $P$ <0.01.

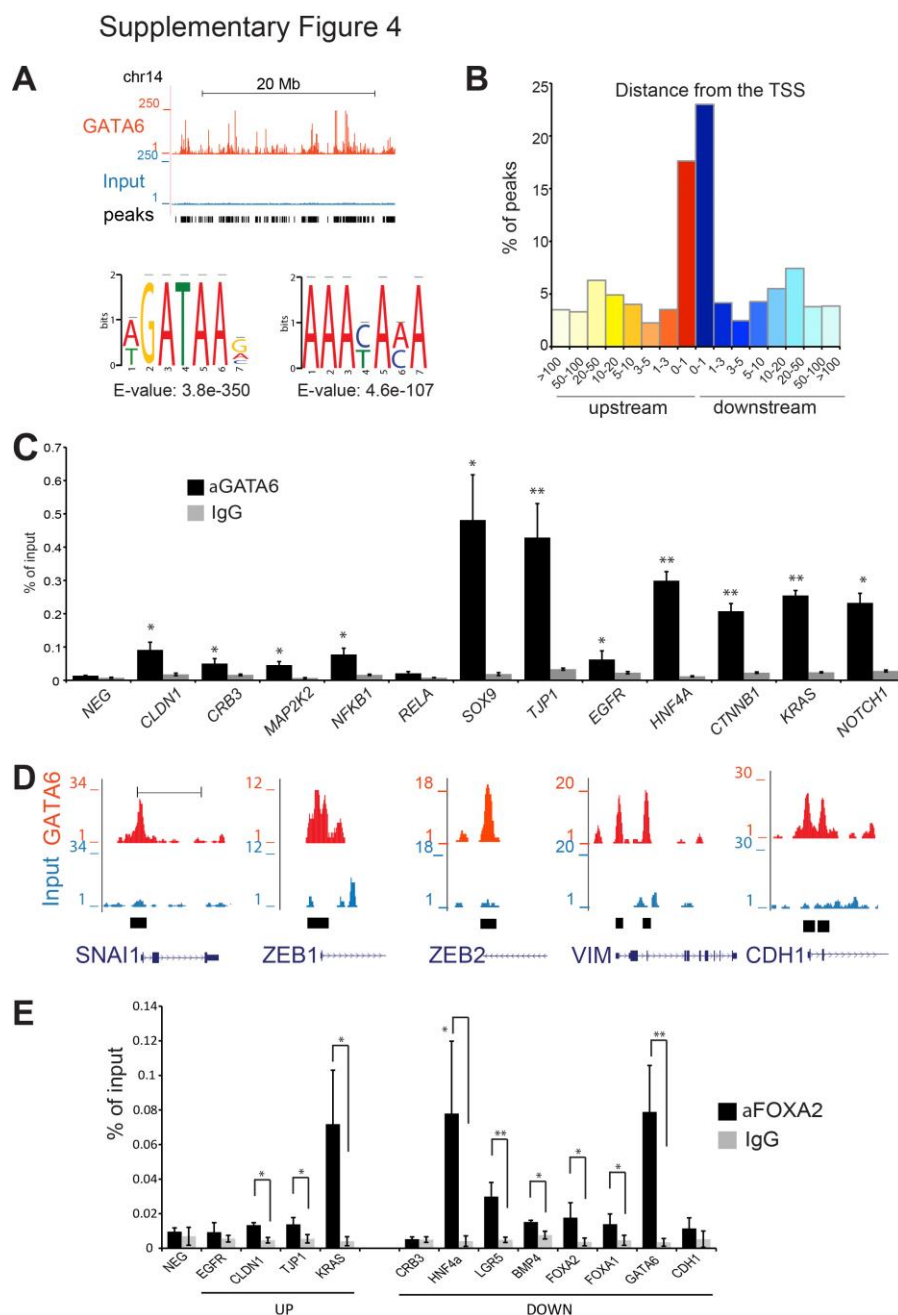

**Supplementary Figure 5. GATA6 correlates with the epithelial phenotype in primary tumors.** Scatter plots showing correlated expression of GATA6, FOXA2, and E-cadherin mRNA in the Moffitt series.  $P < 0.001$  for all the comparisons.

## Supplementary Figure 5

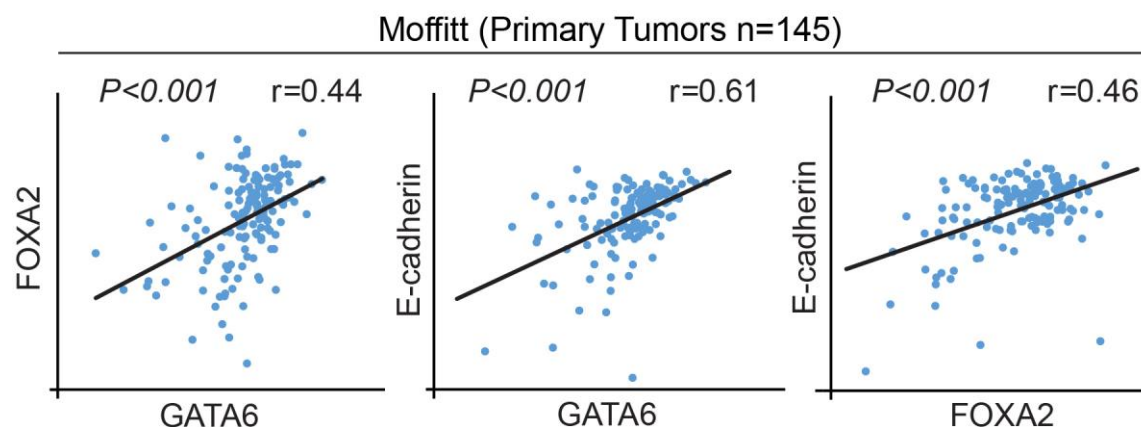

**Supplementary Figure 6. GATA6<sub>low</sub> tumors display upregulation of pathways associated with basal breast cancer.** GSEA plots showing some of the genesets that were most enriched within the genes upregulated in GATA6<sub>low</sub> tumors.

## Supplementary Figure 6

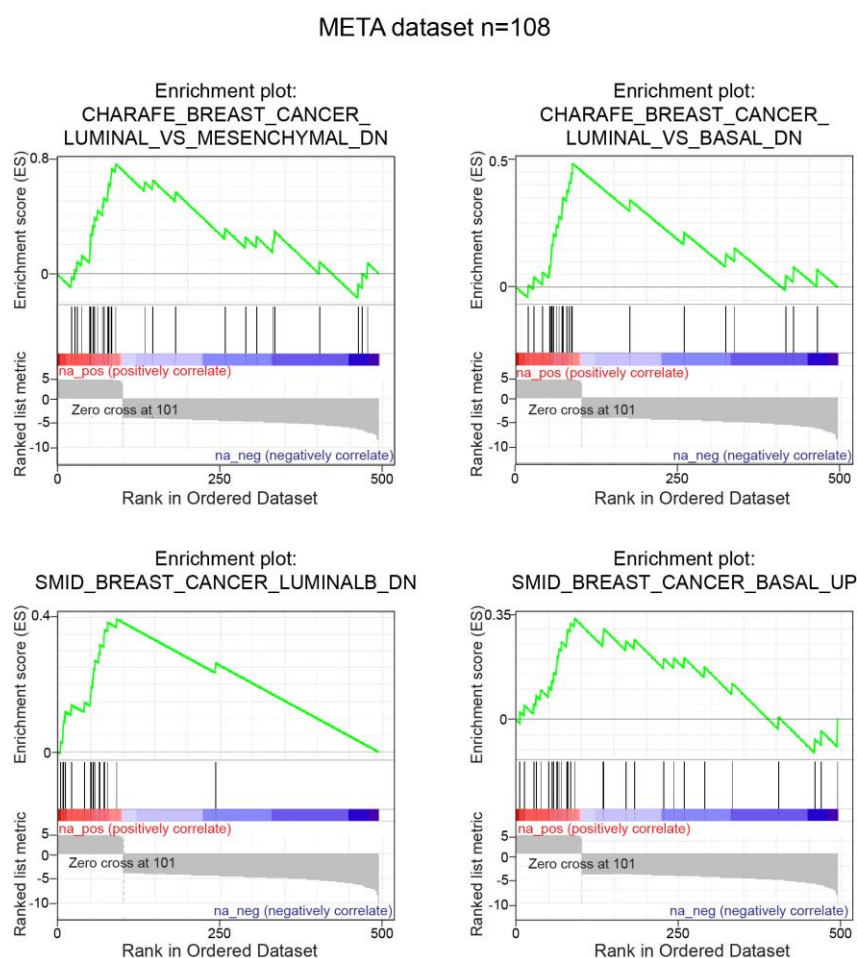



**Supplementary Figure 7. Low GATA6 is detected in a BAS-L subtype of PDACs.** (A) Heat map showing the expression of the BASE47 signature in a meta-dataset of 108 PDAC samples; clustering was performed with the Hierarchical Clustering tool of the GenePattern suite. (B) Boxplot showing the expression of GATA6 in the two groups classified by the BASE47 signature.  $**P<0.0001$ .

Supplementary Figure 7

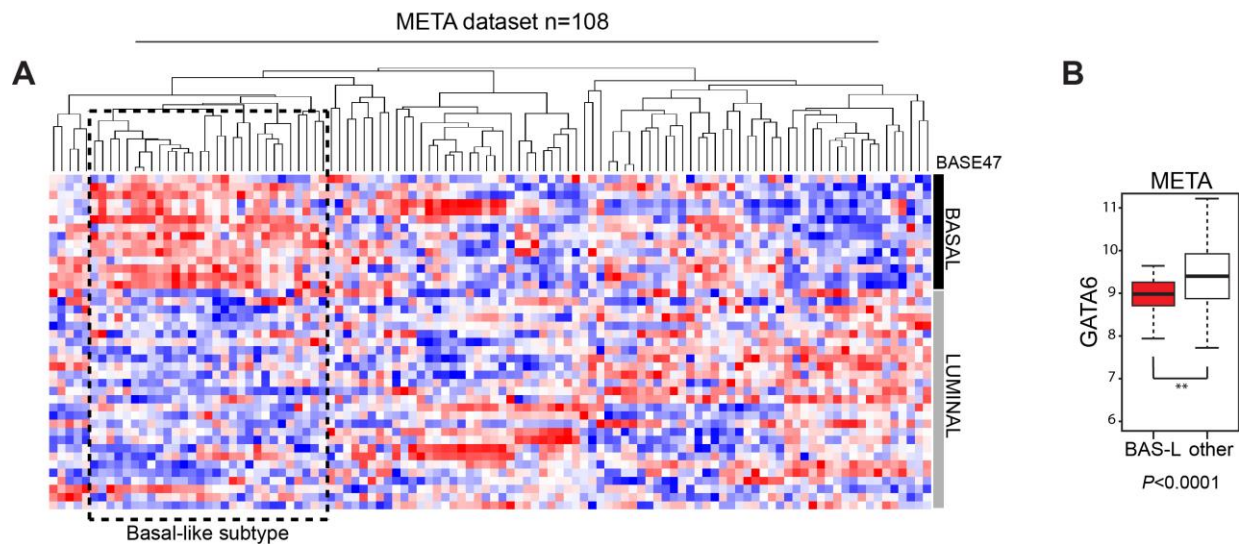



**Supplementary Figure 8. GATA6<sub>low</sub> cells are insensitive to 5-FU.** (A) WB showing the expression of GATA6 in the TKCC cells. GAPDH was used as loading control. (B-D) Scatter plots showing cell survival upon treatment with the indicated doses of 5-FU (B), gemcitabine (C), and paclitaxel (D), plotted against GATA6 protein level. Red square indicates the dose/drug showing significant correlation. Survival was normalized against DMSO-treated cells. Data are presented as median value of at least three independent experiments. Supplementary Figure 8

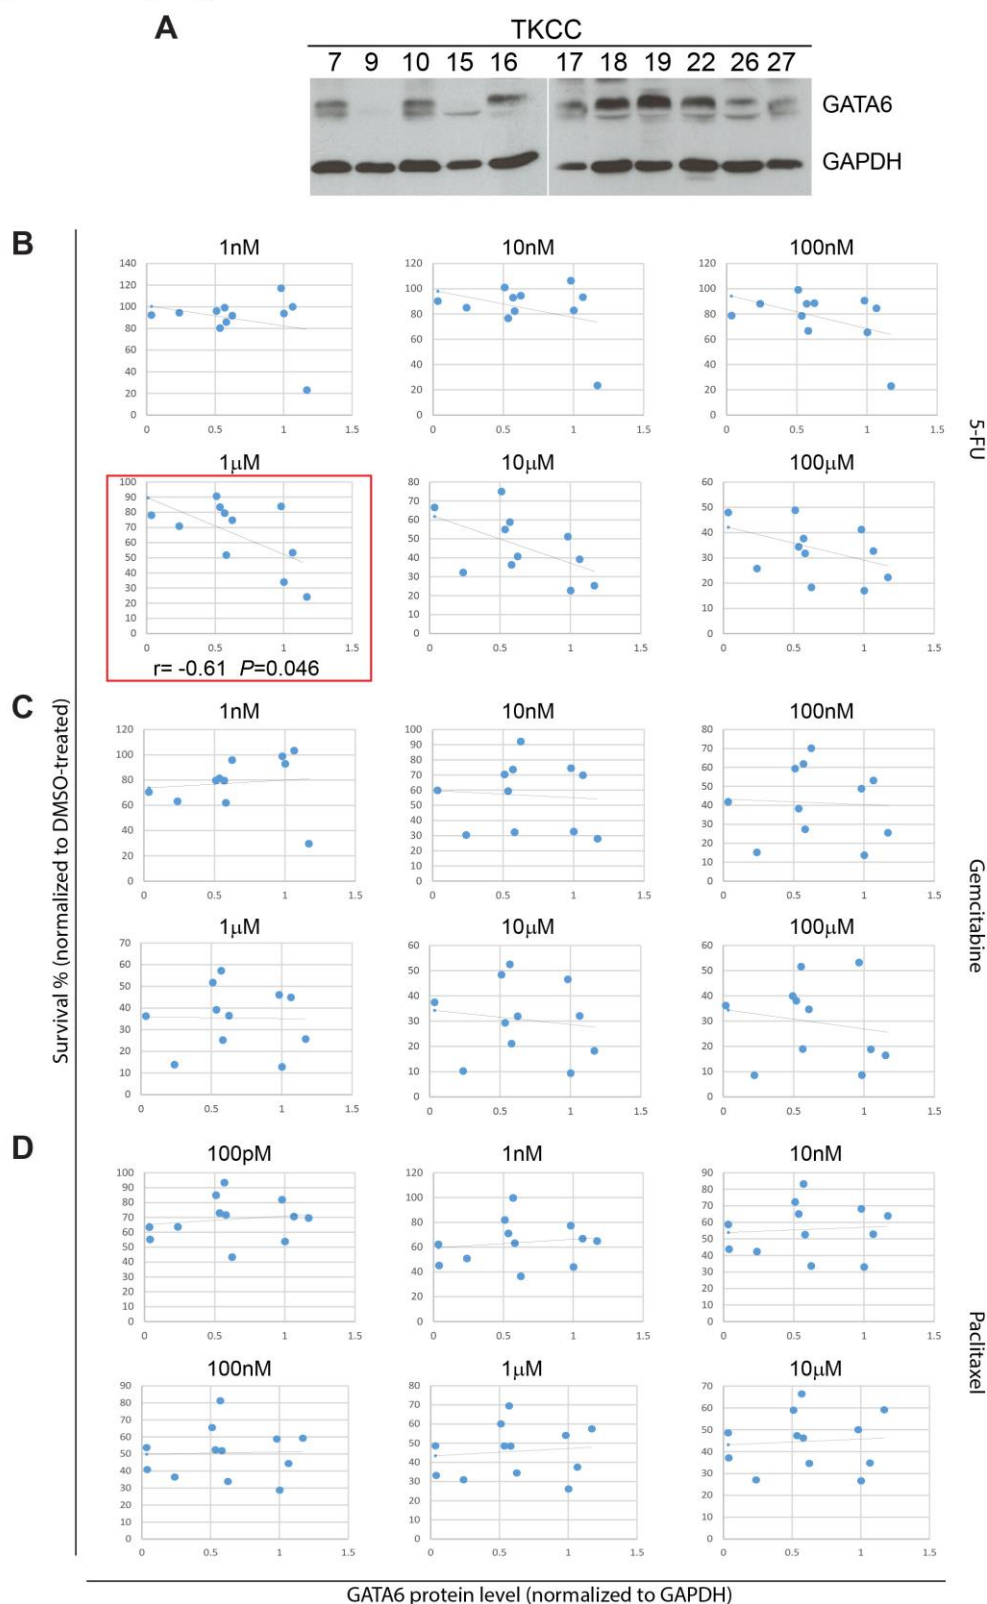

**Supplementary Figure 9. GATA6 modulation does not change drug sensitivity of PaTu8988S and L3.6pl cells.** (A) Western blot showing the extent of GATA6 overexpression and knock-down. Vinculin was used as loading control. (B) Survival of the indicated cells after treatment with increasing doses of either 5-FU or gemcitabine.

## Supplementary Figure 9

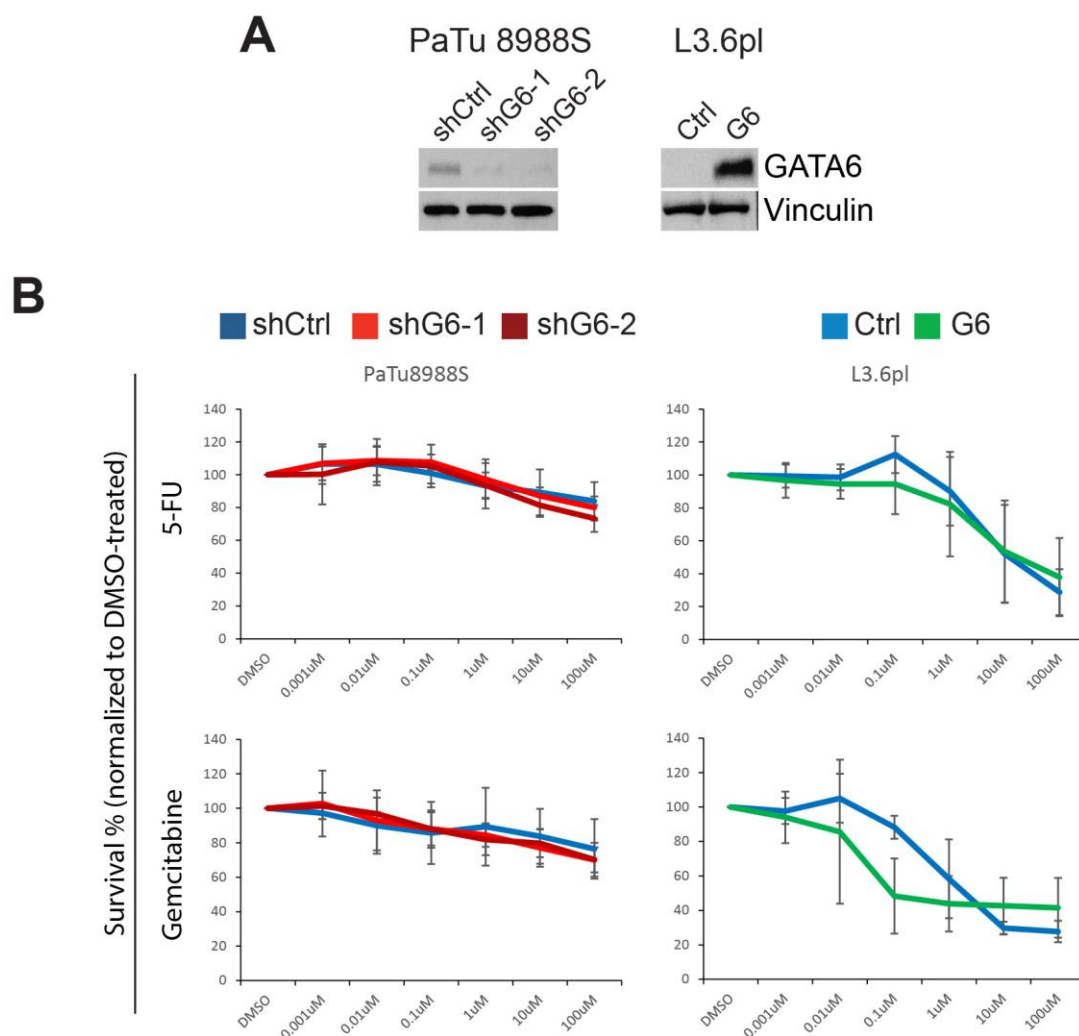

**Supplementary Figure 10. GATA6 modulation does not change drug sensitivity of TKCC cells.** (A) Western blot showing the extent of GATA6 overexpression and knockdown. GAPDH was used as loading control. (B) Survival of the indicated cells after treatment with increasing doses of either 5-FU or gemcitabine.

Supplementary Figure 10

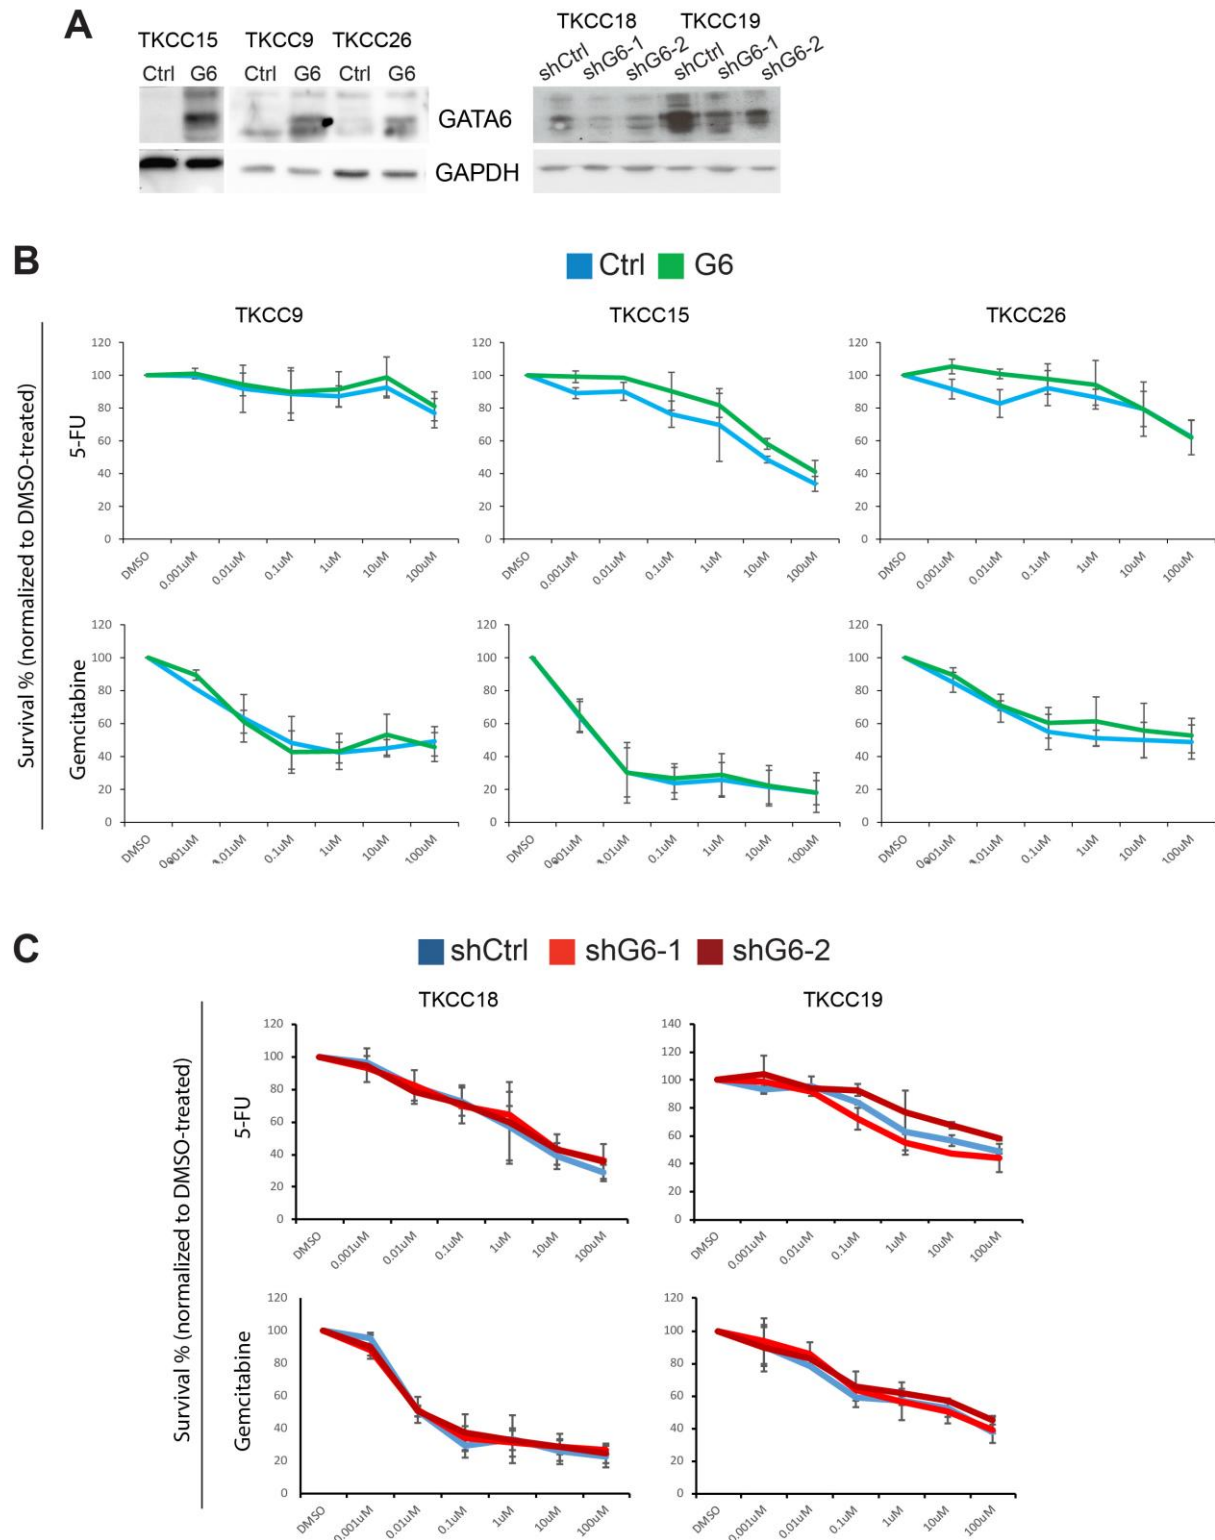

Supplement: inline-supplementary-material-1 [file inline-supplementary-material-1.pdf]
